# Supplementary material for: High performance mesoporous C@Se composite cathodes derived from Ni-based MOFs for Li–Se batteries
Source: Royal Society of Chemistry journal article supplement (doi:10.1039/c5ra14979g), 2015-01-01
Supplement: c5ra14979g1.pdf [file c5ra14979g1.pdf]

## Supporting Information

### High Performance Mesoporous C@Se Composite Cathodes Derived from Ni-based MOFs for Li-Se Batteries

Ting Liu<sup>a, b†</sup>, Yan Zhang<sup>a, b</sup>, Junke Hou<sup>a, b</sup>, Shiyu Lu<sup>a, b</sup>, Jian Jiang<sup>a, b</sup>, Maowen Xu<sup>a, b\*†</sup>

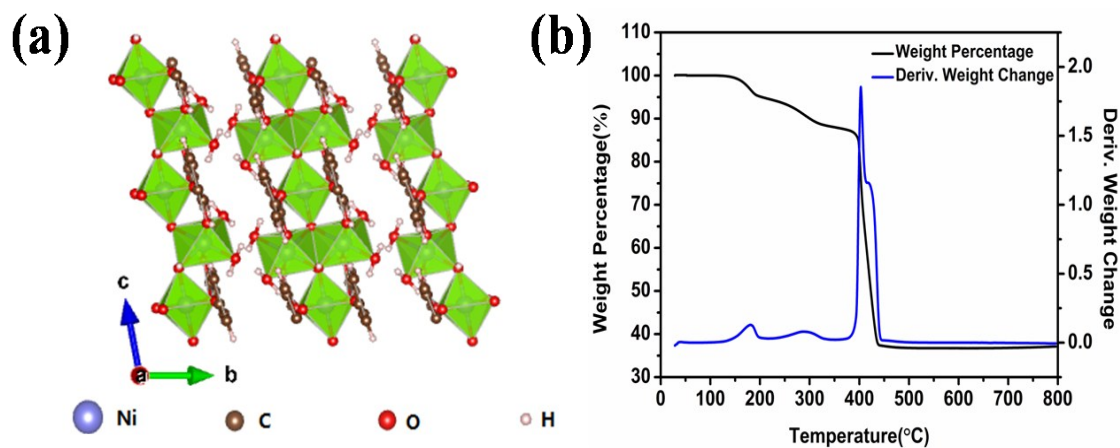

**Fig. S1.** (a) A schematic illustration of the crystal structure of the as-prepared MOF-Ni along the a axis; (b) TGA curve of MOF-Ni.

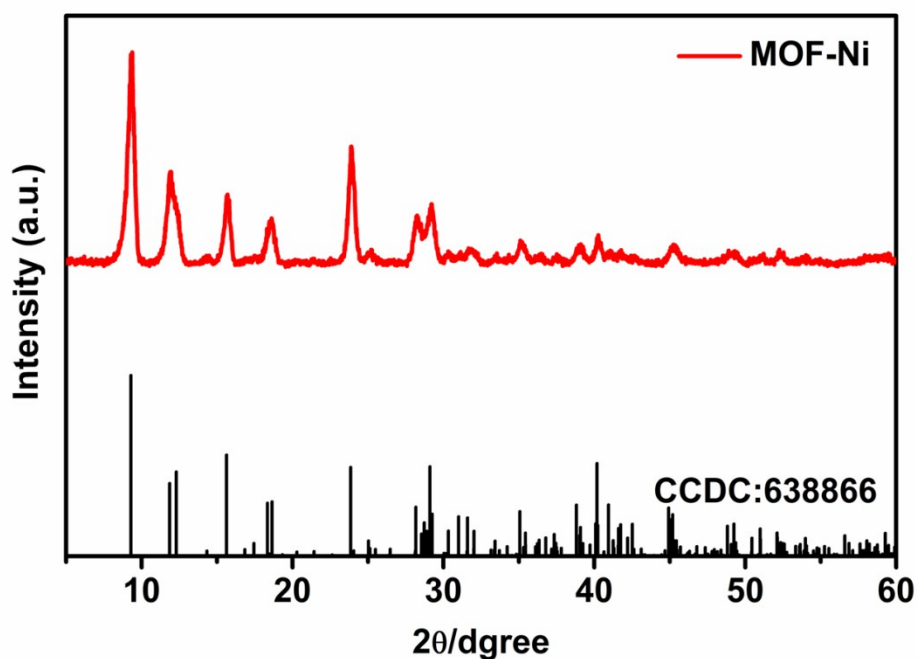

**Fig. S2.** XRD pattern of the MOF-Ni.

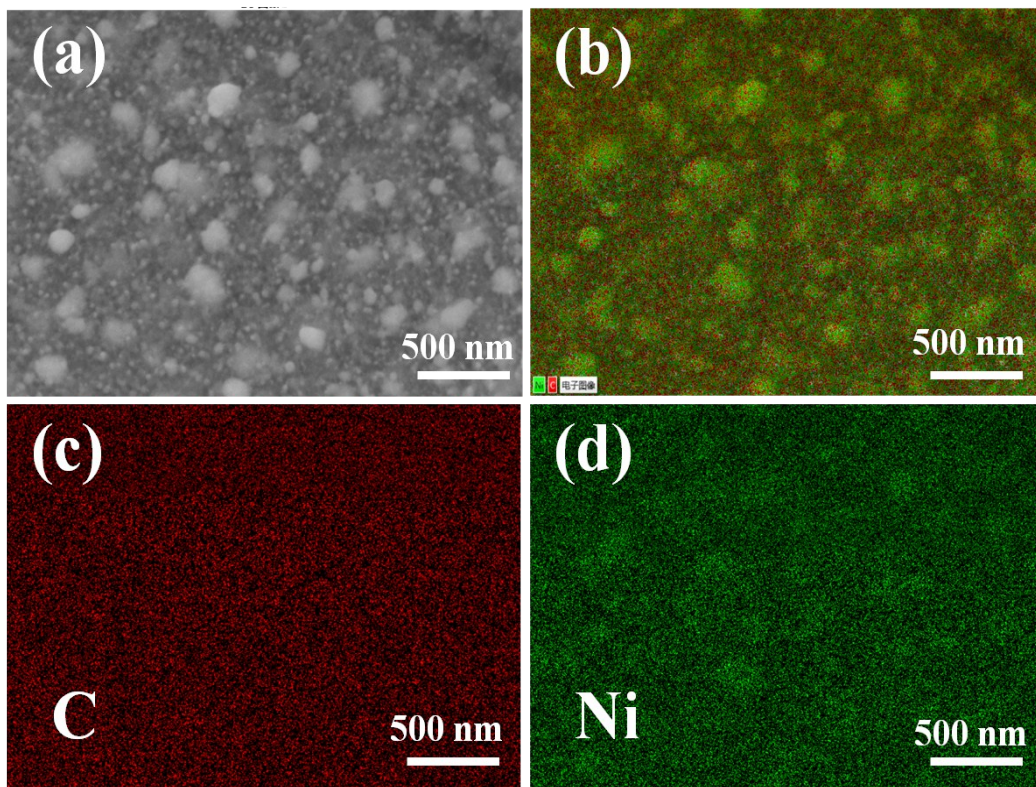

**Fig. S3.** (a), (b) Area of elemental mapping; elemental mappings of carbon (c); and nickel(d).

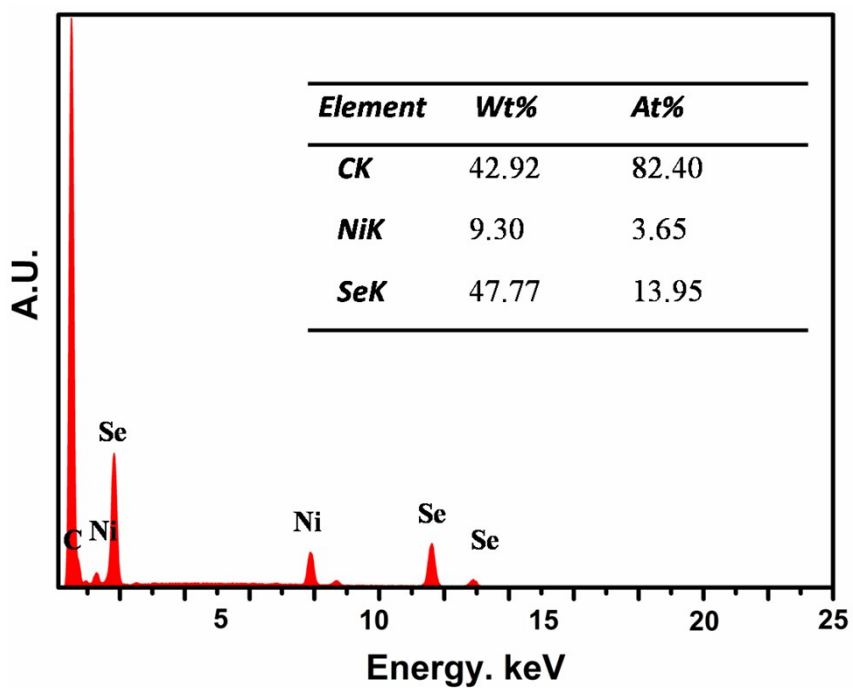

**Fig. S4.** EDS spectra of meso-C@Se.

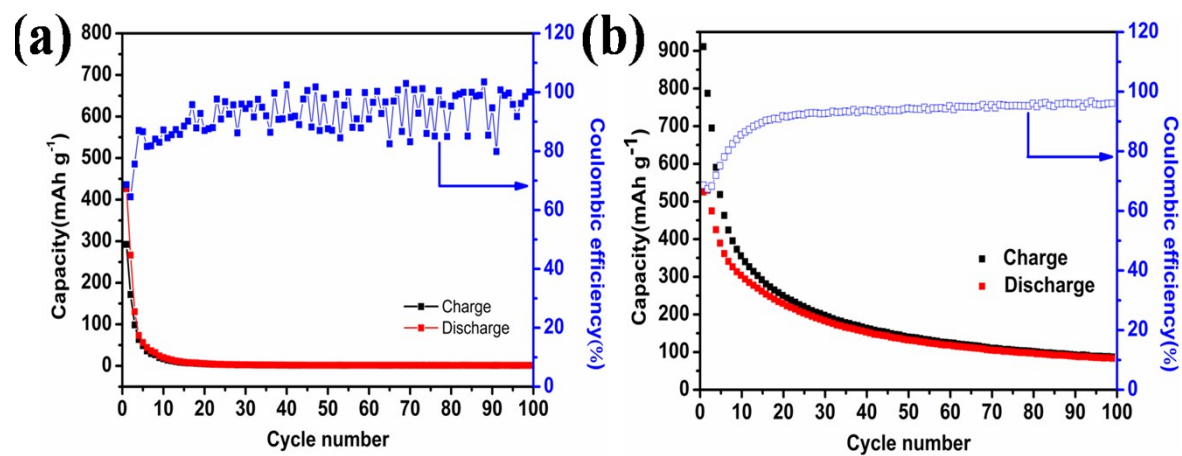

Fig. S5. (a) Cycling performance of NiSe<sub>2</sub>; (b) Cycling performance of CB@Se.
